# Supplementary material for: The Diversity of Sulfide Oxidation and Sulfate Reduction Genes Expressed by the Bacterial Communities of the Cariaco Basin, Venezuela
Source: PubMed Central journal article supplement — Open Microbiol J. 2016 Aug 31;10:140–9. doi: 10.2174/1874285801610010140 (PMC5012083; doi:10.2174/1874285801610010140), 2016-08-31
Supplement: TOMICROJ-10-140_SD-1.pdf [file TOMICROJ-10-140_SD-1.pdf]

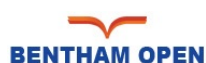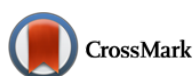

# The Open Microbiology Journal

## Supplementary Material

Content list available at: [www.benthamopen.com/TOMICROJ/](http://www.benthamopen.com/TOMICROJ/)

DOI: 10.2174/1874285801610010140

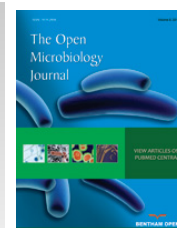

### RESEARCH ARTICLE

## The Diversity of Sulfide Oxidation and Sulfate Reduction Genes Expressed by the Bacterial Communities of the Cariaco Basin, Venezuela

Maria J. Rodriguez-Mora<sup>1</sup>, Virginia P. Edgcomb<sup>2</sup>, Craig Taylor<sup>3</sup>, Mary I. Scranton<sup>4</sup>, Gordon T. Taylor<sup>4</sup> and Andrei Y. Chistoserdov<sup>1,\*</sup>

<sup>1</sup>Department of Biology, University of Louisiana at Lafayette, Lafayette, Louisiana, 70504, USA

<sup>2</sup>Geology and Geophysics Department, Woods Hole Oceanographic Institution, Woods Hole, Massachusetts, 02543, USA

<sup>3</sup>Biology Department, Woods Hole Oceanographic Institution, Woods Hole, Massachusetts, 02543, USA

<sup>4</sup>School of Marine and Atmospheric Sciences, Stony Brook University, Stony Brook, New York, 11794, USA

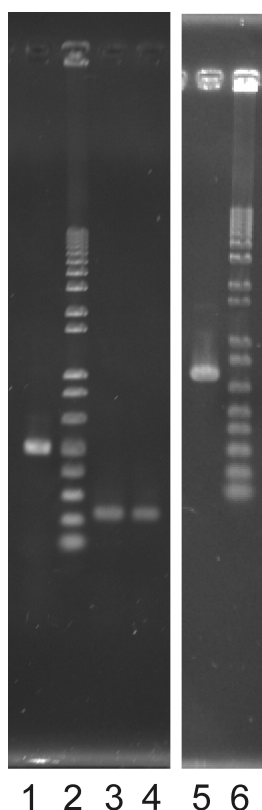

**Supp. (1).** A photograph of gels loaded with PCR amplified fragments of the *sqr* and *dsrA* genes. Lane 1: an amplicon generated by the SQR-G1-475FM and SQR-G1-964R primers; lanes 2 and 6: 1 Kb Plus DNA Ladder (Invitrogen, Carlsbad, CA); lanes 3 and 4: an amplicon generated by the *dsrA*1FM and *dsr*225R1 primers; line 5: an amplicon generated by the SQR-G4-140FB and SQR-G4-840RM primers.
